# Supplementary material
Source: PubMed Central journal article supplement (PMC2866075)

## Supporting Information

# Apoptosis Inducing Galactolipids from a Cultured Marine Diatom *Phaeodactylum Tricornutum*

Eric H. Andrianasolo,<sup>†</sup> Liti Haramaty,<sup>†</sup> Assaf Vardi,<sup>†</sup> Eileen White,<sup>‡,§,⊥</sup> Richard Lutz<sup>†</sup> and Paul Falkowski<sup>†\*</sup>

*Center for Marine Biotechnology, Institute of Marine and Coastal Sciences, Rutgers, The State University of New Jersey NJ 08901-8521*

*Center for Advanced Biotechnology and Medicine, Department of Molecular Biology and Biochemistry, Rutgers, The State University of New Jersey, 679 Hoes Lane, Piscataway, New Jersey 08854*

*University of Medicine and Dentistry of New Jersey, Robert Wood Johnson Medical School, 675 Hoes Lane, Piscataway, New Jersey 08854*

*The Cancer Institute of New Jersey, 195 Little Albany Street, New Brunswick, New Jersey 08903*

<sup>†</sup> IMCS, Rutgers, The State University of New Jersey.

<sup>‡</sup> CABM, Rutgers, The State University of New Jersey.

<sup>§</sup> University of Medicine and Dentistry of New Jersey.

<sup>⊥</sup> The Cancer Institute of New Jersey.

### **Spectral Data for Compound (1) in CDCl<sub>3</sub>**

**Figure S1.** 300 MHz <sup>1</sup>H NMR spectrum of compound (1) in CDCl<sub>3</sub>

**Figure S2.** 75 MHz <sup>13</sup>C NMR spectrum of compound (1) in CDCl<sub>3</sub>

**Figure S3.** 75 MHz <sup>13</sup>C NMR spectrum of compound (1) in CDCl<sub>3</sub> (partial view of the olefinic region)

**Figure S4.** 75 MHz <sup>13</sup>C NMR spectrum of compound (1) in CDCl<sub>3</sub> (partial view of the aliphatic region)

**Figure S5.** 300 MHz <sup>1</sup>H-<sup>1</sup>H COSY spectrum of compound (1) in CDCl<sub>3</sub>

**Figure S6.** 300 MHz Multiplicity-edited HSQC spectrum of compound (1) in CDCl<sub>3</sub>

**Figure S7.** 300 MHz Multiplicity-edited HSQC spectrum of compound (1) in CDCl<sub>3</sub> (partial view of the signal belonging to the proton between 0 to 4 ppm)

**Figure S8.** 300 MHz HMBC spectrum (optimized for  $J = 8\text{Hz}$ ) of compound (1) in CDCl<sub>3</sub>

**Figure S9.** 300 MHz HMBC spectrum (optimized for  $J = 8\text{Hz}$ ) of compound (1) in CDCl<sub>3</sub> (Terminal methyl correlations)

**Figure S10.** MALDI-TOF spectrum of compound(1)

**Figure S11.** MALDI-TOF spectrum of compound(2)

Figure S1.300 MHz <sup>1</sup>H NMR spectrum of compound (1) in CDCl<sub>3</sub>

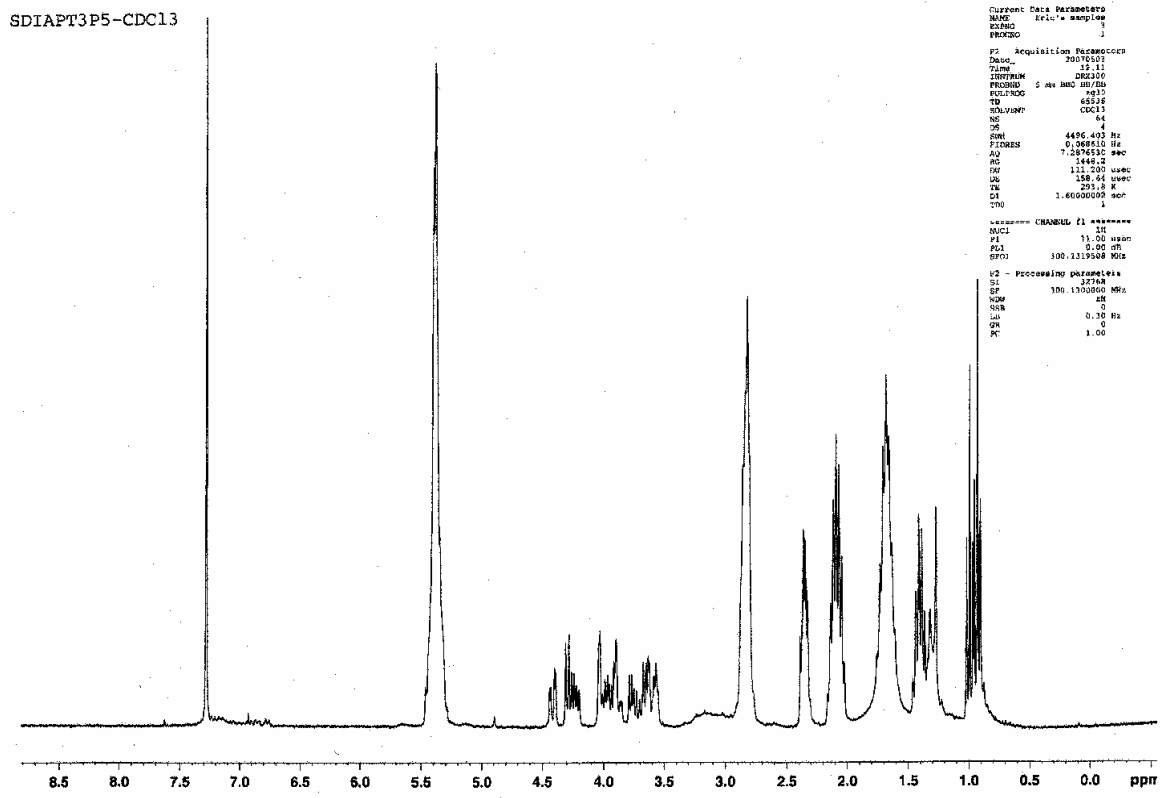

Figure S2.75 MHz  $^{13}\text{C}$  NMR spectrum of compound (1) in  $\text{CDCl}_3$

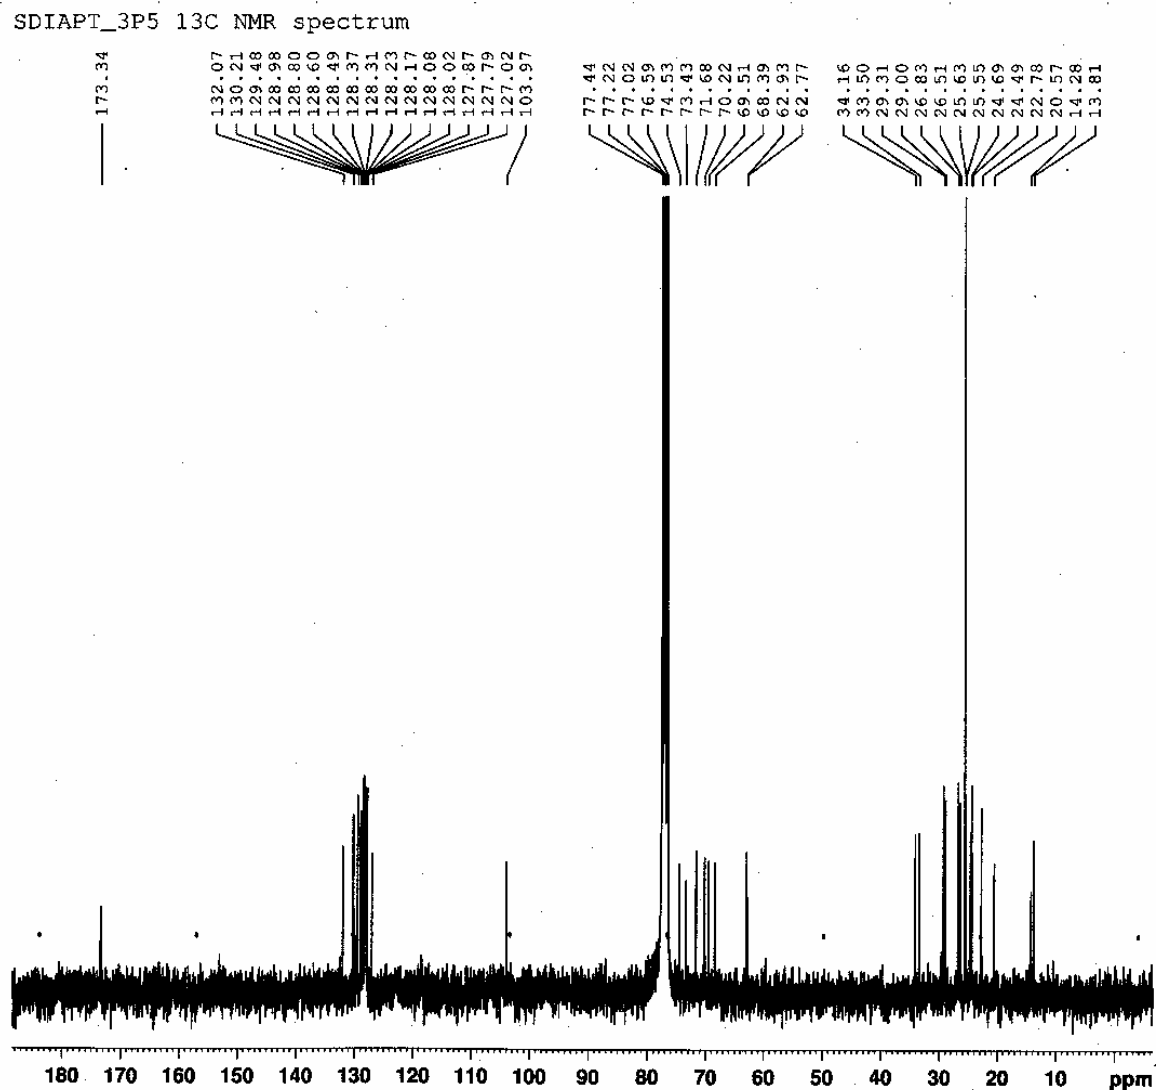

**Figure S3.75** MHz  $^{13}\text{C}$  NMR spectrum of compound (1) in  $\text{CDCl}_3$  (partial view of the olefinic region)

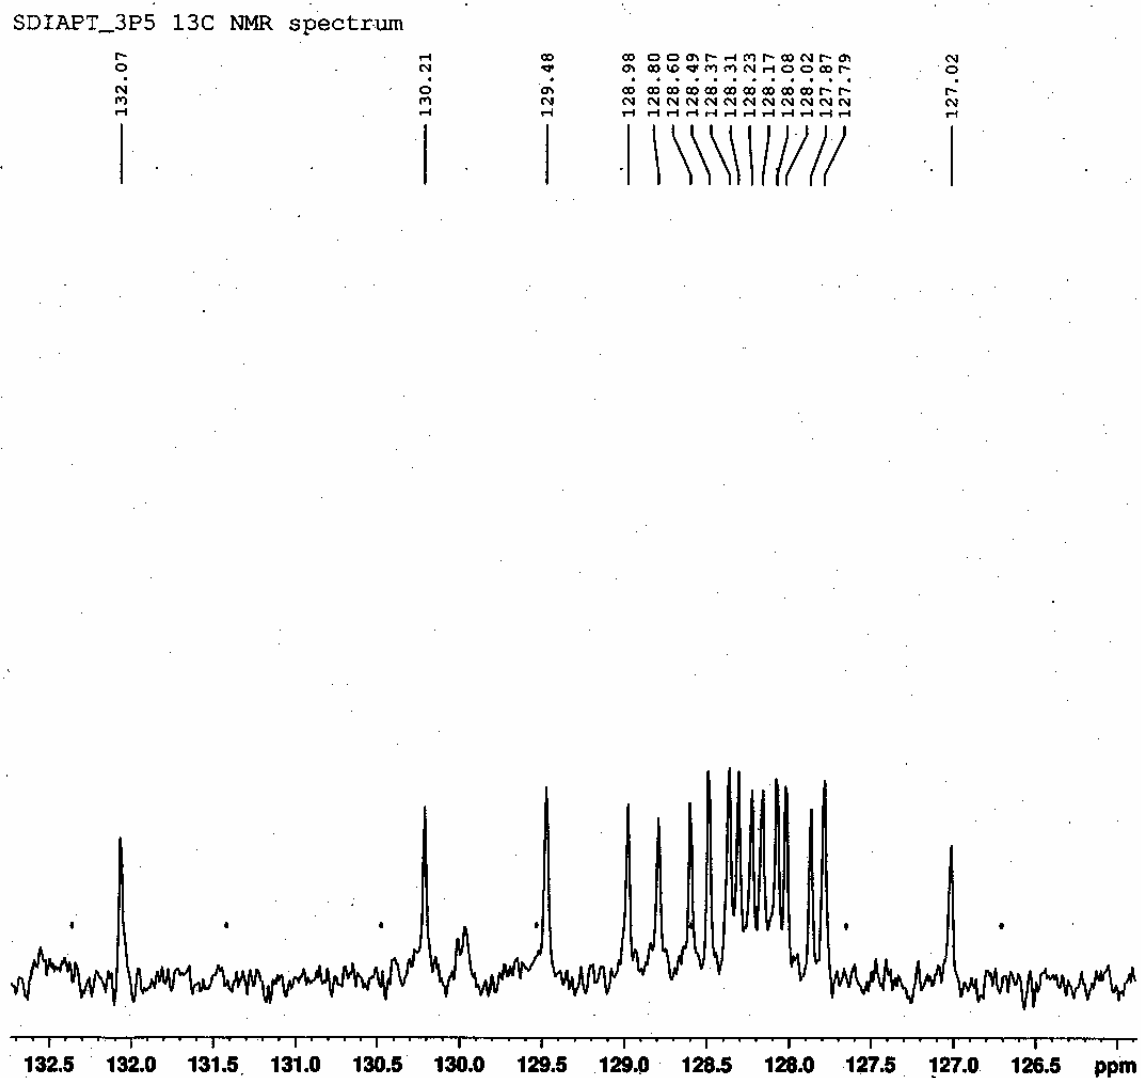

**Figure S4.** 75 MHz  $^{13}\text{C}$  NMR spectrum of compound (1) in  $\text{CDCl}_3$  (partial view of the aliphatic region)

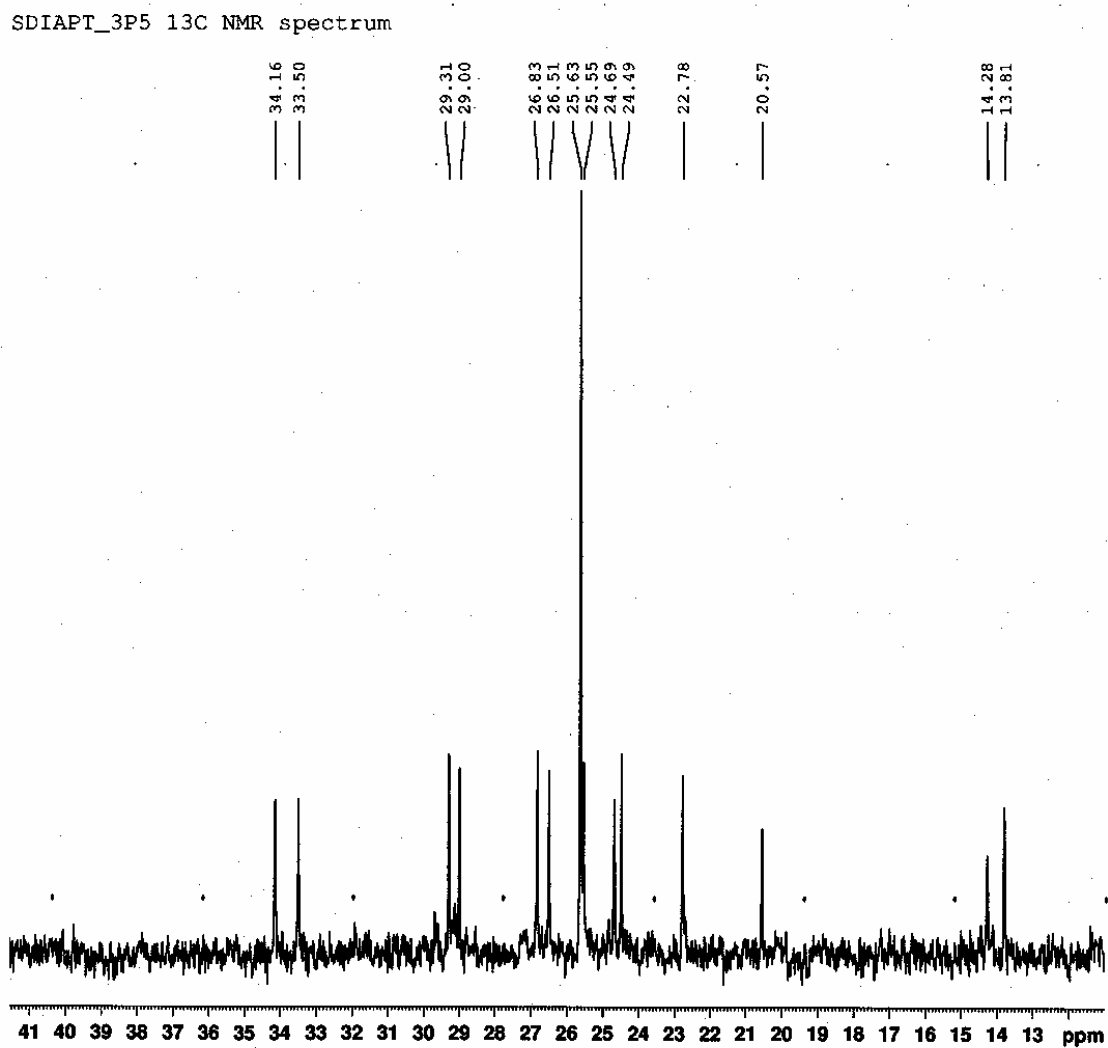

**Figure S5** 300 MHz  $^1\text{H}$ - $^1\text{H}$  COSY spectrum of compound (**1**) in  $\text{CDCl}_3$

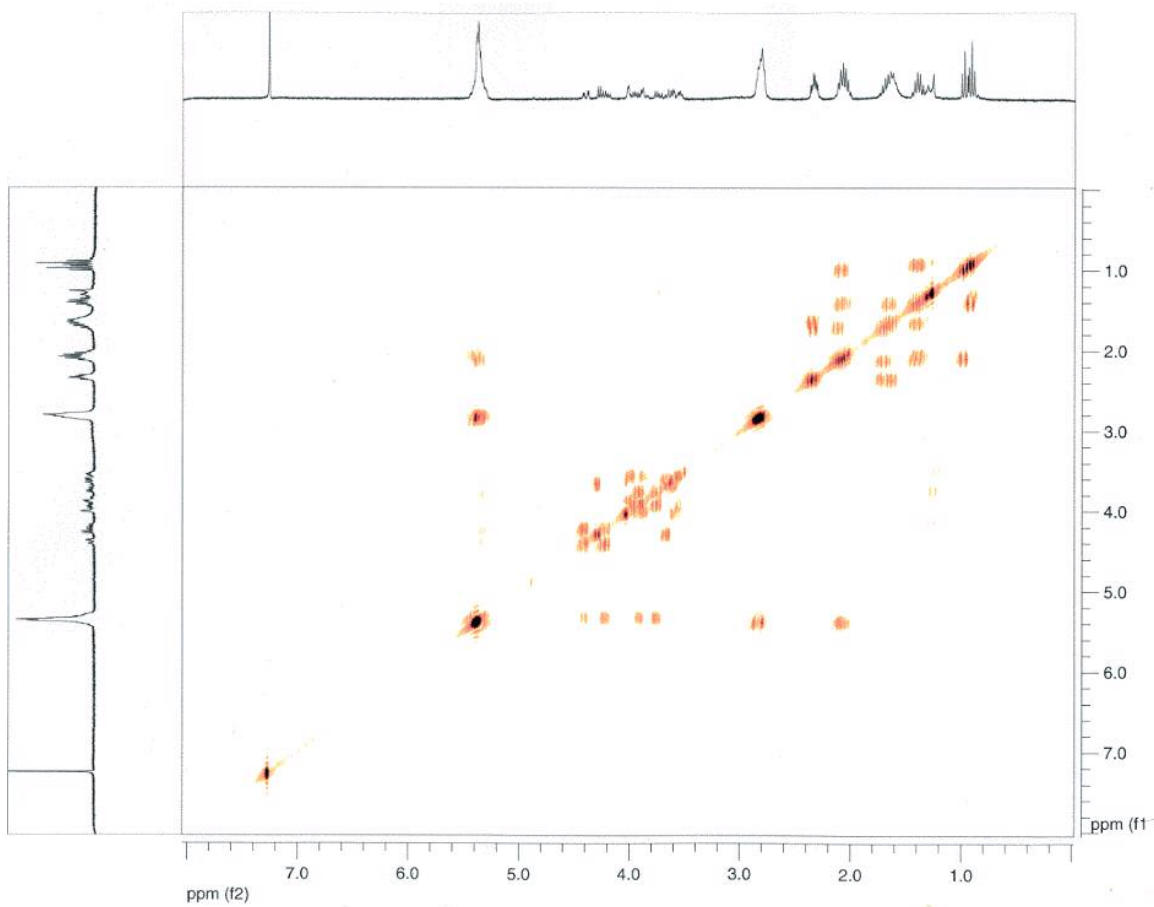

**Figure S6** 300 MHz Multiplicity-edited HSQC spectrum of compound **(1)** in  $\text{CDCl}_3$

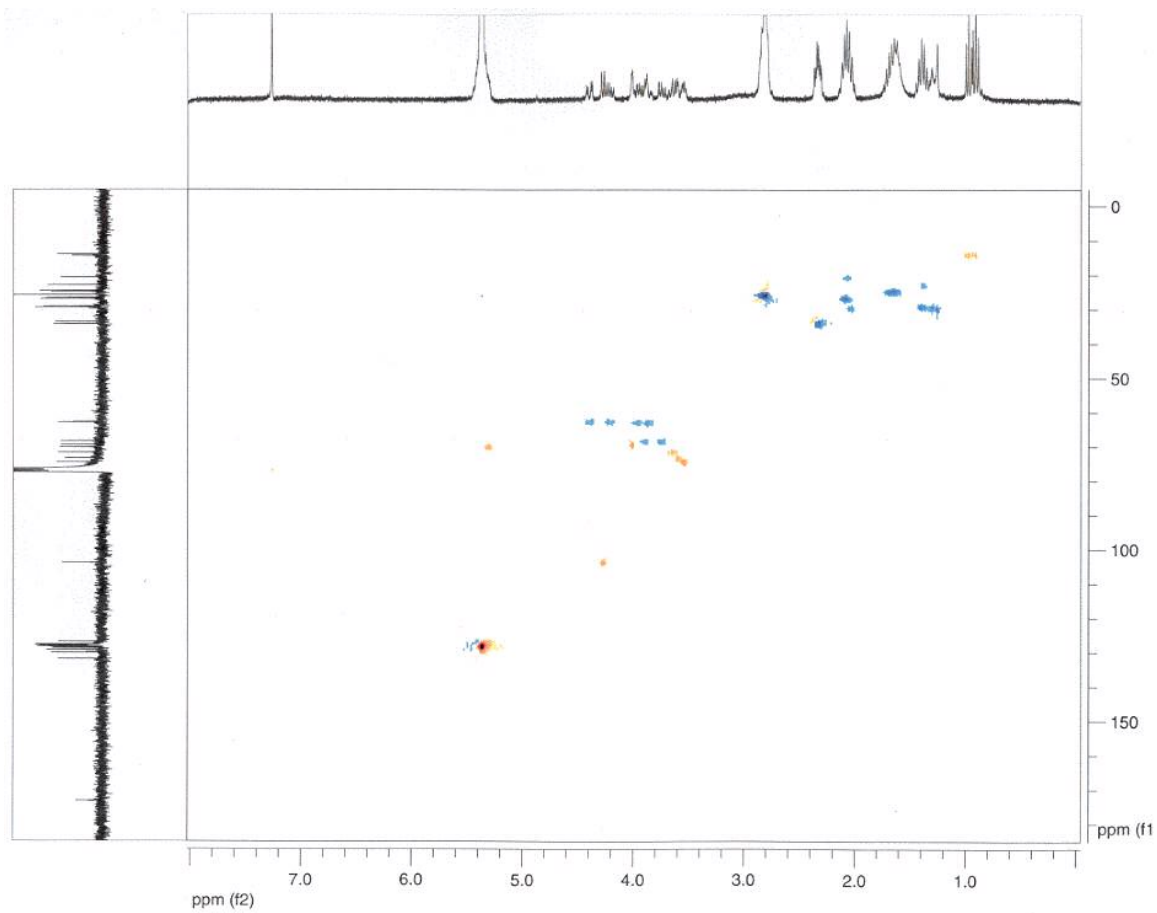

**Figure S7** 300 MHz Multiplicity-edited HSQC spectrum of compound **(1)** in CDCl<sub>3</sub> (partial view of the signal belonging to the proton between 0 to 3.5 ppm)

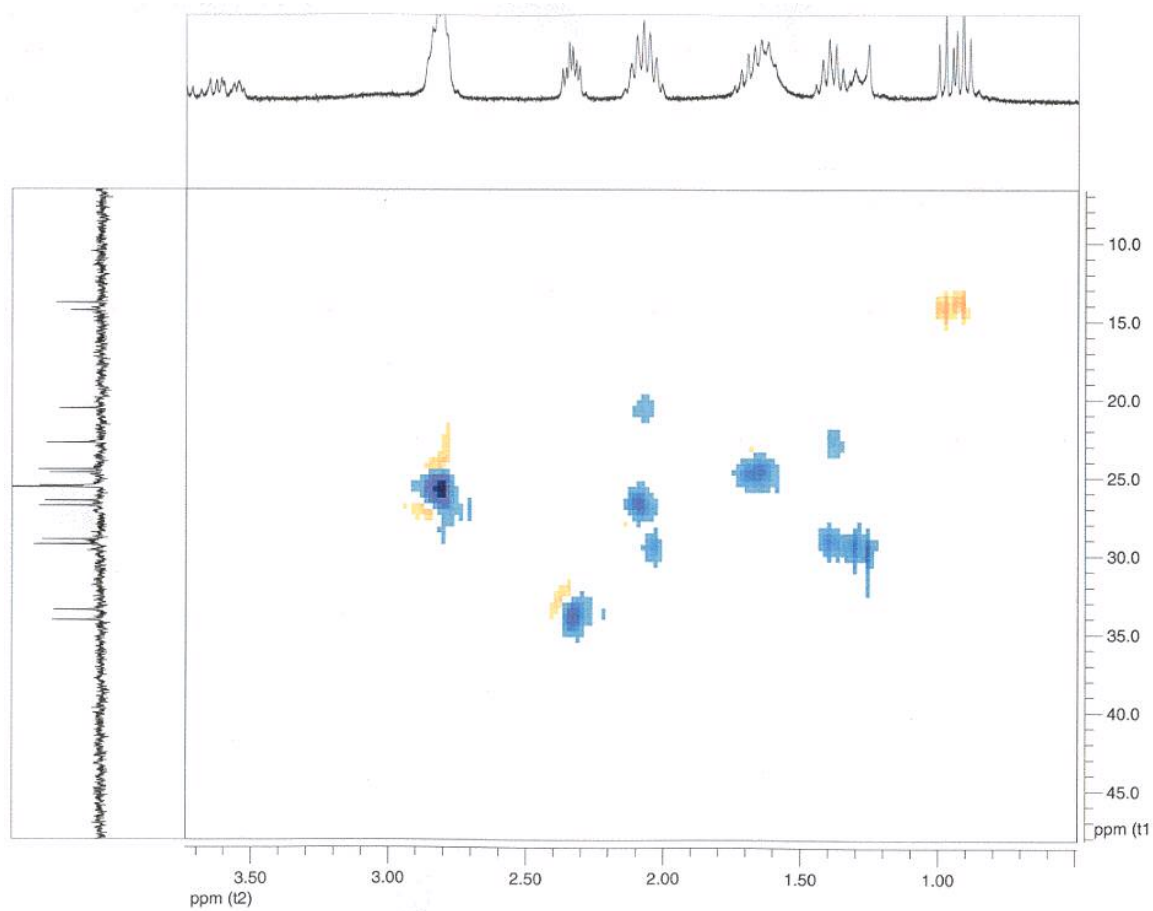



**Figure S8** 300 MHz HMBC spectrum (optimized for  $J = 8\text{Hz}$ ) of compound (**1**) in  $\text{CDCl}_3$

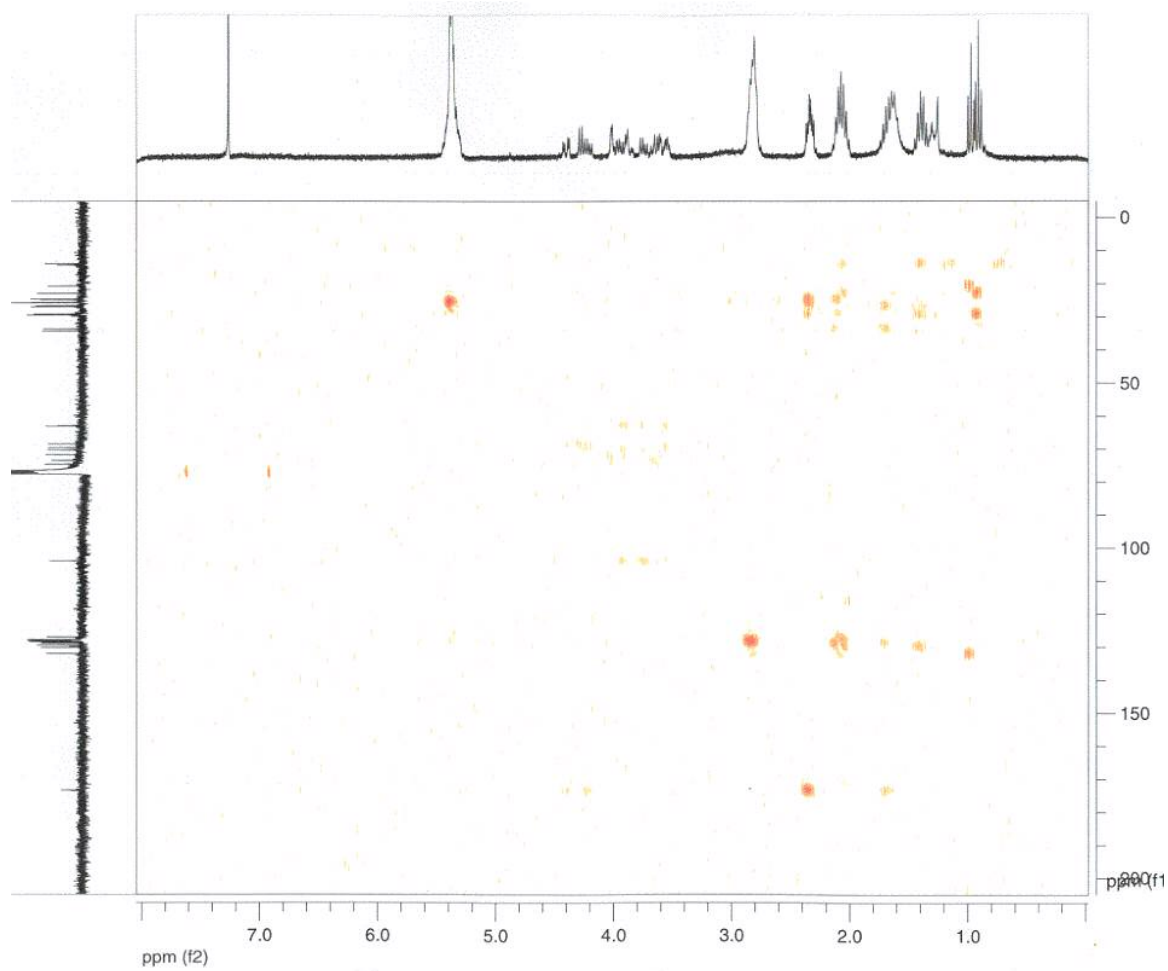

**Figure S9** 300 MHz HMBC spectrum (optimized for  $J = 8\text{Hz}$ ) of compound (**1**) in  $\text{CDCl}_3$  (Terminal methyl correlations)

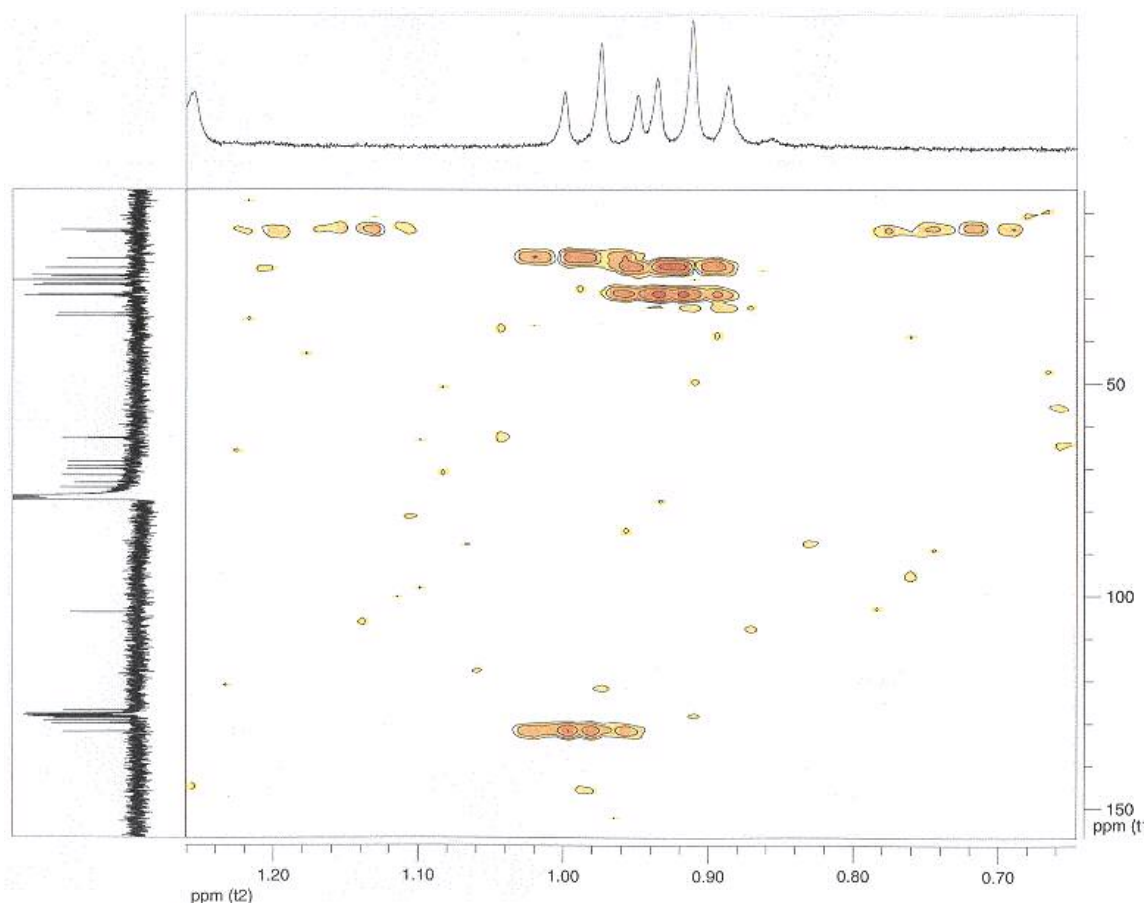

Figure S10 MALDI-TOF spectrum of compound(1)

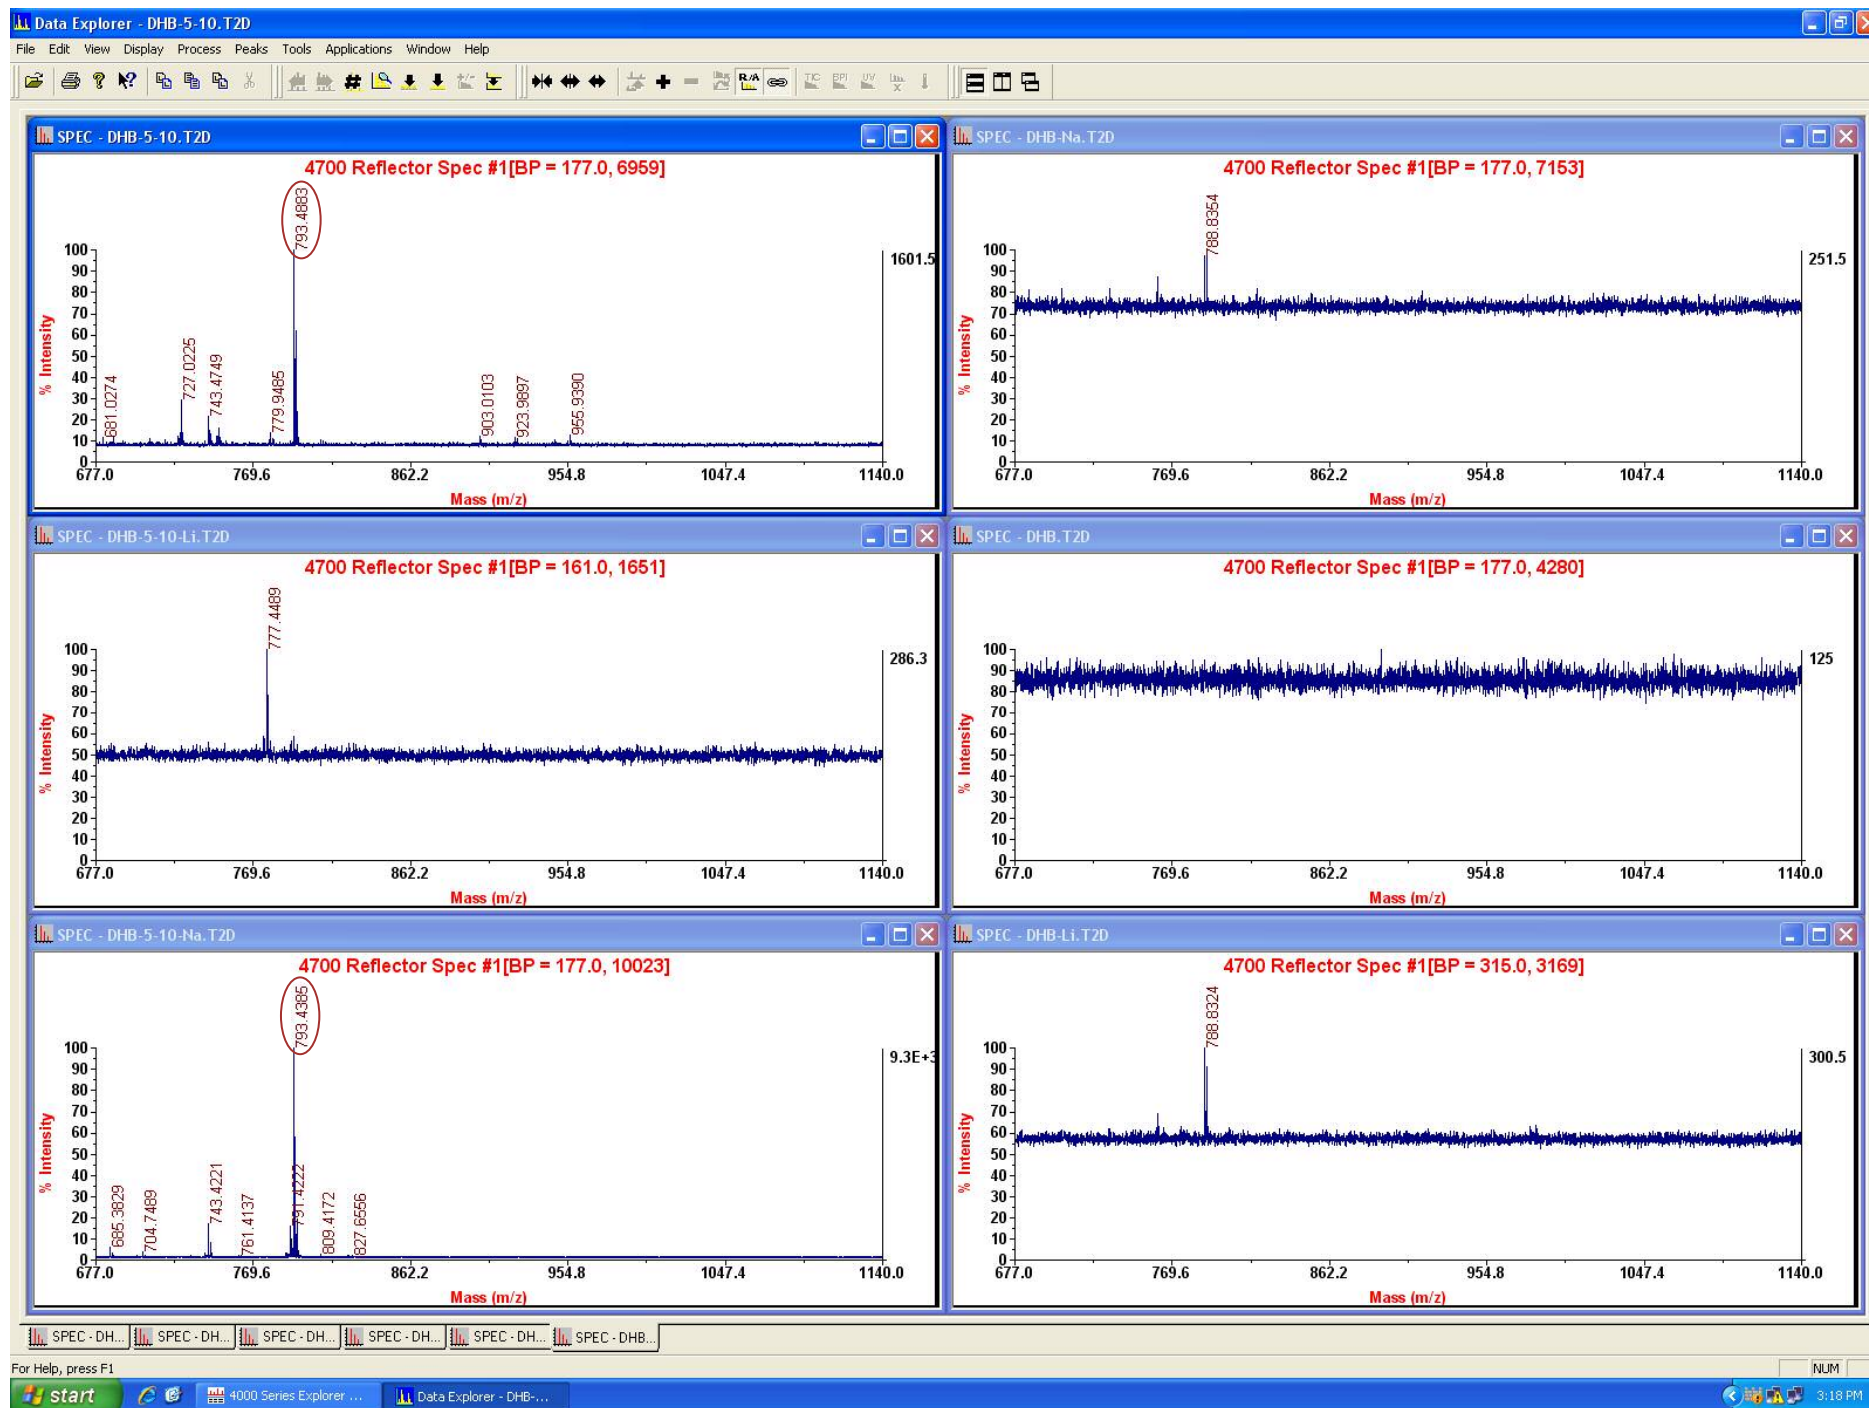

Figure S11 MALDI-TOF spectrum of compound(2)

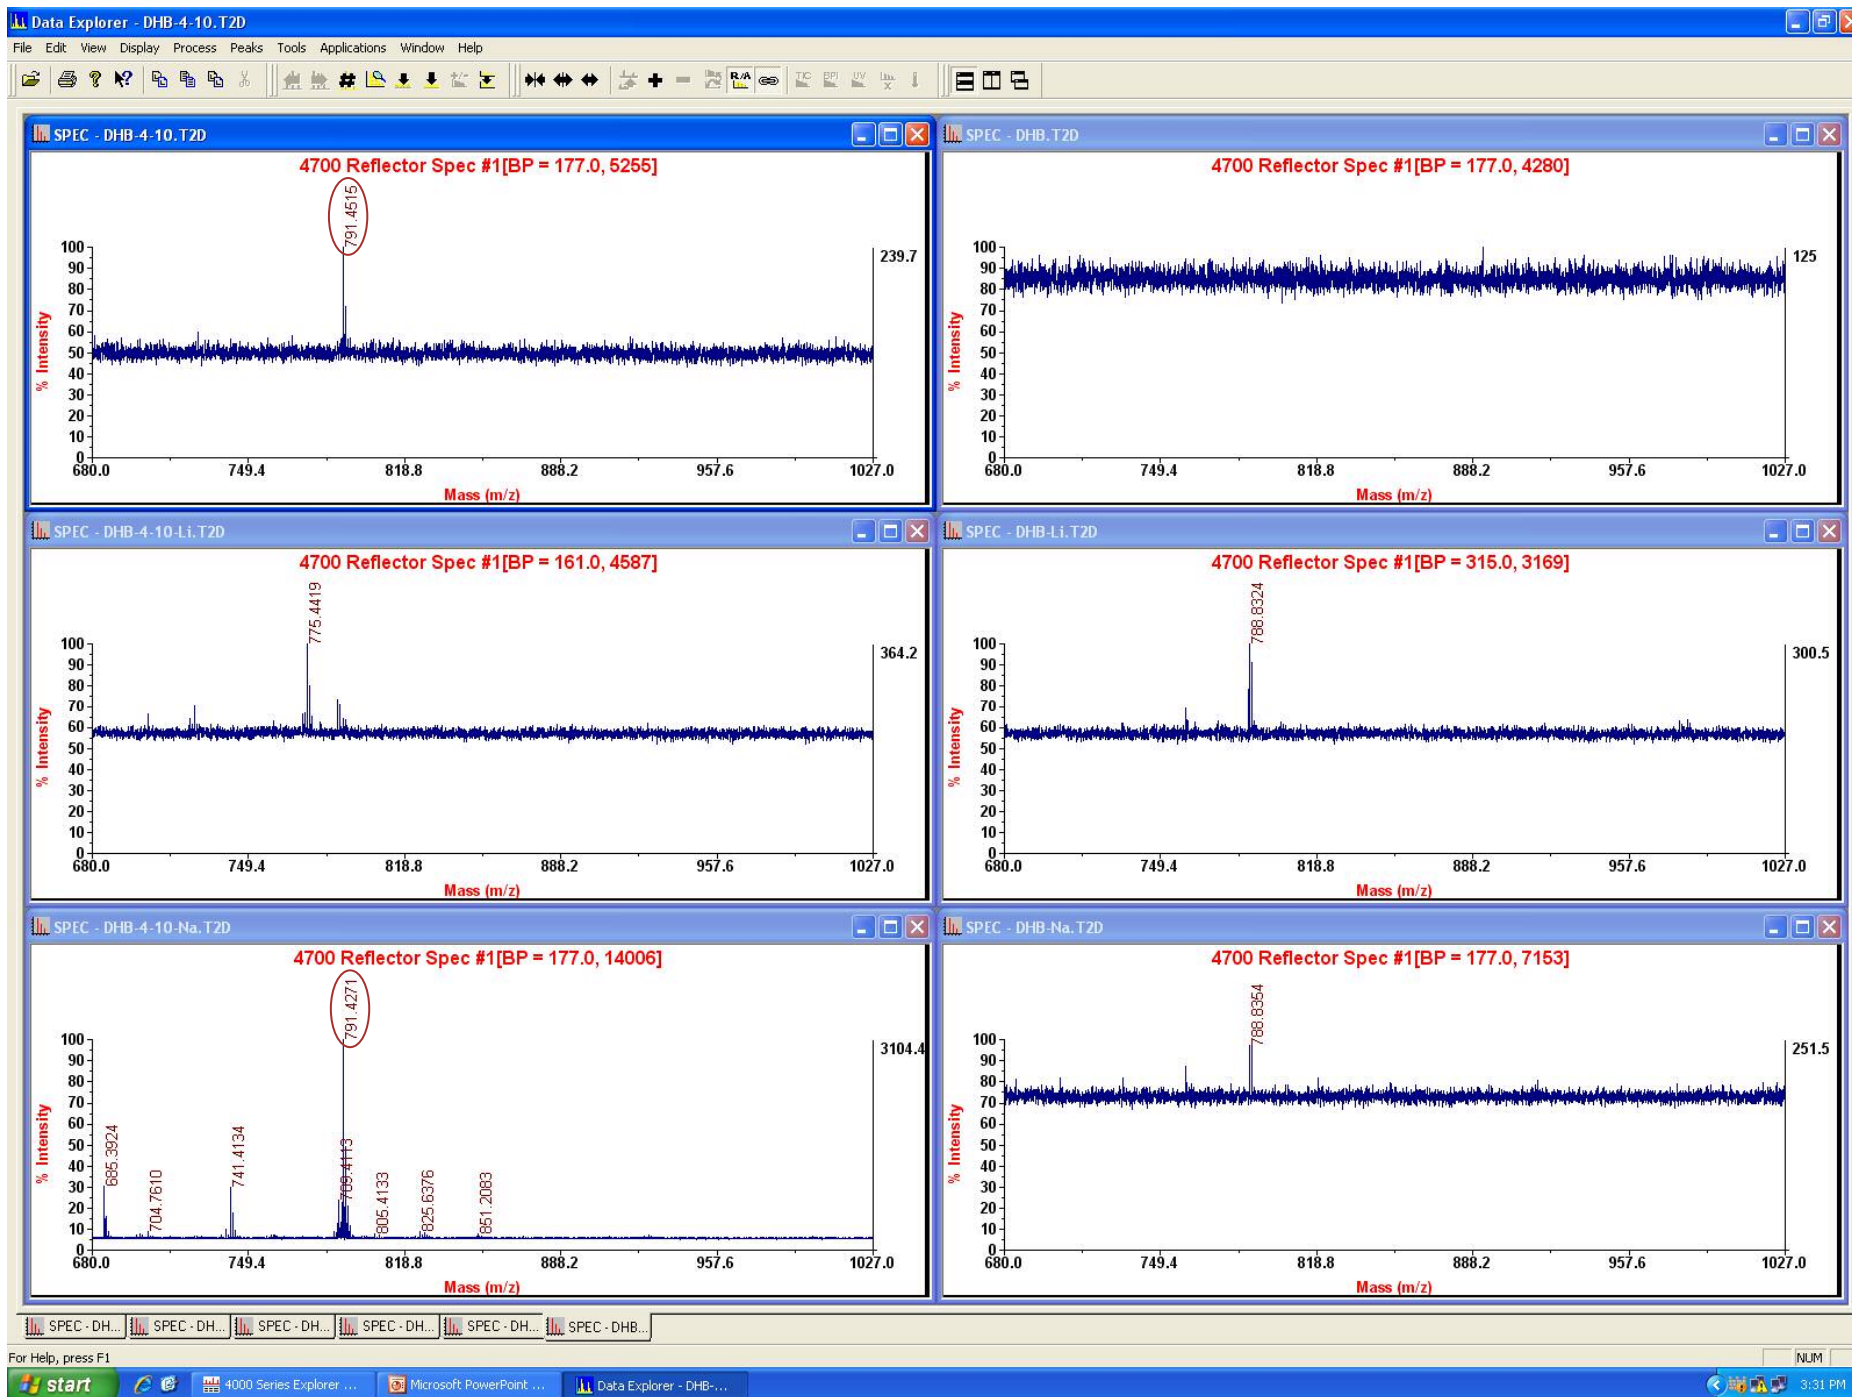

Supplement: NIHMS193379-supplement-supp_info.pdf [file NIHMS193379-supplement-supp_info.pdf]
